# Supplementary material
Source: PubMed Central journal article supplement (PMC4598300)
Supplement: NIHMS717983-supplement.pdf [file NIHMS717983-supplement.pdf]

Short Article

## The PTEN Tumor Suppressor Forms Homodimers in Solution

Frank Heinrich<sup>1,3</sup>

Srinivas Chakravarthy<sup>4,5</sup>

Hirsh Nanda<sup>1,3</sup>

Antonella Papa<sup>6,7</sup>

Pier Paolo Pandolfi<sup>7</sup>

Alonzo H. Ross<sup>8</sup>

Rakesh K. Harishchandra<sup>9</sup>

Arne Gericke<sup>9</sup>

Mathias Lösche<sup>1,2,3,\*</sup>

quench@cmu.edu

<sup>1</sup>Department of Physics, Carnegie Mellon University, Pittsburgh, PA 15213, USA

<sup>2</sup>Department of Biomedical Engineering, Carnegie Mellon University, Pittsburgh, PA 15213, USA

<sup>3</sup>NIST Center for Neutron Research, National Institute of Standards and Technology, Gaithersburg, MD 20899, USA

<sup>4</sup>BioCAT, Center for Synchrotron Radiation Research and Instrumentation, Argonne National Laboratory, Argonne, IL 60439, USA

<sup>5</sup>Department of Biological and Chemical Sciences, Illinois Institute of Technology, Chicago, IL 60616, USA

<sup>6</sup>Department of Biochemistry and Molecular Biology, Faculty of Medicine, Nursing and Health Sciences, Monash University, Melbourne, VIC 3800, Australia

<sup>7</sup>Cancer Research Institute, Beth Israel Deaconess Cancer Center, Department of Medicine and Pathology, Beth Israel Deaconess Medical Center, Harvard Medical School, Boston, MA 02215, USA

<sup>8</sup>Department of Biochemistry and Molecular Pharmacology, University of Massachusetts Medical School, Worcester, MA 01605, USA

<sup>9</sup>Department of Chemistry and Biochemistry, Worcester Polytechnic Institute, Worcester, MA 01609, USA

\*Corresponding author

Published: August 20, 2015

---

### Summary

As the phosphoinositol-3-kinase antagonist in the PI3K pathway, the PTEN tumor suppressor exerts phosphatase activity on diacylphosphatidylinositol triphosphate in the plasma membrane. Even partial loss of this activity enhances tumorigenesis, but a mechanistic basis for this aspect of PTEN physiology has not yet been established. It was recently proposed that PTEN mutations have dominant-negative effects in cancer via PTEN dimers. We show that PTEN forms homodimers in vitro, and determine a structural model of the complex from SAXS and Rosetta docking studies. Our findings shed new light on the cellular control mechanism of PTEN activity. Phosphorylation of the unstructured C-terminal tail of PTEN reduces PTEN activity, and this result was interpreted as a blockage of the PTEN membrane binding interface through this tail. The results presented here instead suggest that the C-terminal tail

functions in stabilizing the homodimer, and that tail phosphorylation interferes with this stabilization.

---

---

Heinrich et al. show that the phosphatase domains of PTEN form a homodimer that is likely stabilized through a domain-swapping interaction of the two C-terminal tails. This provides a structural basis for the PTEN dimer hypothesis and sheds new light on cellular control via tail phosphorylation.

---

**Keywords:** PI3K/Akt pathway; PTEN phosphatase; dimer structure; SAXS; protein docking

## Introduction

The diacylphosphatidylinositol-3,4,5-triphosphate (PI(3,4,5)P<sub>3</sub>)-specific lipid phosphatase PTEN (Li et al., 1997; Steck et al., 1997) is frequently mutated in human cancers (Simpson and Parsons, 2001; Stiles, 2009) and suppresses cell proliferation by limiting AKT phosphorylation in the phosphoinositide-3-kinase (PI3K) signaling pathway. Even partial loss of PTEN activity (haploinsufficiency) enhances tumorigenesis (Berger et al., 2011). Genetic loss of *Pten* and mutations that affect functionality of the expressed protein are not equivalent, as patients with missense mutations develop lesions at a higher frequency than patients with gene deletion or drastic truncations (Marsh et al., 1998), so that missense mutations are, paradoxically, worse than nothing (Leslie and den Hertog, 2014). These observations can be rationalized by postulating that PTEN dimerizes in its active form, and indeed a recent study presented evidence for PTEN dimerization in vivo and inferred that dimers are more active phosphatases than monomers (Papa et al., 2014). Here, we study structural aspects of PTEN dimerization in vitro. We find that the dimer state of bacterially expressed PTEN is favored over the monomeric form, and derive a structural model of the PTEN dimer complex from small-angle X-ray scattering (SAXS) and docking studies that is consistent with earlier neutron reflection (NR) and molecular dynamics (MD) results (Shenoy et al., 2012a). The PTEN monomer includes multiple disordered segments, the largest of which is its C-terminal tail (Lee et al., 1999). While the monomer is partially unstructured as shown by the SAXS results, the dimer is well folded and forms a compact particle, suggesting that the C-terminal tail plays a role in dimer stabilization. Phosphorylation of the tail was shown to inhibit PTEN membrane phosphatase activity (Rahdar et al., 2009). In addition, it affects the efficiency of dimerization (Papa et al., 2014). In combination with our structural results reported here, this suggests a novel control mechanism in which phosphorylation weakens the association of the two C-terminal tails with the protein domains, thereby destabilizing the dimer, while dimerization is presumably required for the phosphatase to reach its full enzymatic activity.

PTEN is a 403-amino-acid (aa) protein with an N-terminal, dual-specificity phosphatase domain and a C-terminal, non-canonical C2 domain that binds anionic lipids independent of Ca<sup>2+</sup> (Lee et al., 1999). In addition, PTEN includes a short (13 aa) N terminus and the 51-aa C terminus, both of which are unstructured. While the tumor suppressor function of PTEN depends on the interaction of the phosphatase with the plasma membrane (PM), the vast majority of the protein resides in the cytosol and interacts with the PM only sporadically (Redfern et al., 2010; Vazquez et al., 2006). Cellular control of this dynamic interaction has been debated (Ross and Gericke, 2009); in particular, phosphorylation of the C-terminal tail affects PTEN membrane localization (Rahdar et al., 2009). While other post-translational modifiers may affect PTEN membrane binding (Huang et al., 2012), we showed that bacterially expressed PTEN binds lipid membranes in vitro with high affinity and a strong dependence on lipid composition (Shenoy et al., 2012b).

## Results

As a test for PTEN homodimerization in vitro, a glutathione S-transferase (GST) pull-down assay with purified GST-PTEN and PTEN-His<sub>6</sub> on a glutathione column showed His-tagged protein after elution. This signal was confirmed by western blotting using a His-tag specific antibody (Figure S1). Next, we used SAXS to characterize the structure of bacterially expressed PTEN. In distinction from the protein used in the pull-down assay, this PTEN was tag-free. The protein was eluted from a size-exclusion chromatography (SEC) column and tracked by UV absorbance (Figure 1A). This trace is overlaid with the total X-ray scattering intensity, collected in >250 individual exposures of the eluted protein as it passes through the X-ray beam, approximately 1 min after passing the UV detector. In addition, the extrapolated ( $q \rightarrow 0$ ), background-corrected X-ray intensities,  $I_0$ , are shown for 14 exposures across the elution peak.

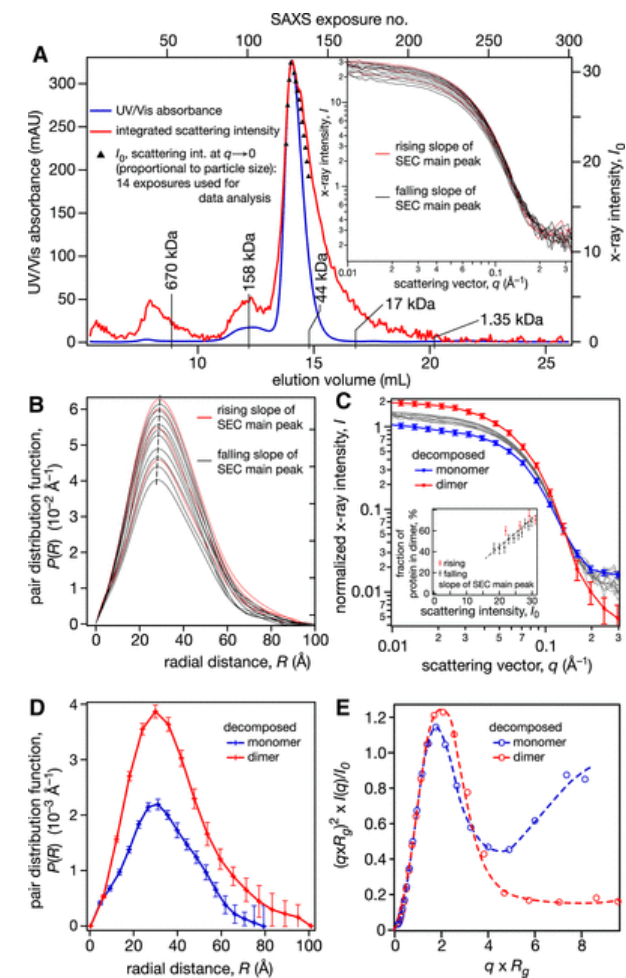

**Figure 1** SAXS Measurements and Data Analysis

For a biochemical characterization of PTEN dimer formation, see [Figure S1](#).

(A) Protein concentration determined by UV absorbance (blue) and by the X-ray scattering intensity of a sample of PTEN eluted from an SEC. Molecular weight markers were derived from a calibration run with standards from Bio-Rad between 1.35 kDa (vitamin B12) and 670 kDa (thyroglobulin). The integrated X-ray scattering intensity on the detector is shown in red; black data points show  $I_0$ , the background-corrected radial averages of the forward scattered X-ray intensities extrapolated to  $q=0$ .  $I_0$  values are only shown for exposures that were further used for data analysis, close to the maximum of the monomer elution peak at  $\approx 14.1$  ml. Because the exact length of a  $\approx 1$ -min delay between passage of the protein solution through the UV detector and the X-ray beam is not precisely known, signals were horizontally shifted to coincide at the peak positions. The time lag resulting from the travel of the sample in the capillary results in a broadening of the protein concentration-dependent X-ray intensities in comparison with the concentration-dependent UV absorbance. The difference between integrated X-ray intensity and  $I_0$  at elution volumes  $>14.5$  ml is likely due to protein adsorption on the cuvette walls. The inset shows the reduced SAXS data associated with these 14 exposures.

(B) Pair distribution functions of the scattering centers derived from the scattering curves in the inset in (A) show a systematic dependence of their maximum positions **and the on** protein concentration in the beam (proportional to their integrated areas). As a guide for the eye, the dashed line indicates these maxima of  $P(R)$ .

(C) Normalized SAXS intensities (thin lines) and their decomposition into two basis vectors from a simultaneous fit to all 14 datasets. The component coefficients that represent the fraction of protein in the dimer are shown in the inset.

(D) Pair distribution functions corresponding to the basis vector scattering curves in (C).

(E) Normalized Kratky plots of the two basis vectors in (D) for the monomer and the dimer. Dashed lines are guides to the eye.

Error bars in (C) and (D) indicate 68% confidence intervals. For Guinier plots of the SAXS data, see [Figure S2](#).

We selected 14 SAXS exposures of protein from the major elution peak, indicated by their  $I_0$  values in [Figure 1A](#) and shown in the inset, for a detailed evaluation. While we expected to observe scattering from a homogeneous PTEN fraction, a detailed analysis raised doubts about this interpretation. The maxima of the pair distribution functions,  $P(R)$ , shifted to higher  $R$  values with increasing  $I_0$  (proportional to the protein concentration in the beam), as shown in [Figure 1B](#). Similarly, we noticed differences in the slopes of the Guinier plots, i.e., the radii of gyration of the scattering particles ([Figure S2](#)). While small, these differences showed a systematic dependence on protein concentration. In view of these concentration-dependent variations, we decomposed the 14 SAXS exposures into linear combinations of two basis vectors and found that this two-state model fitted all experimental data simultaneously within experimental errors. The basis vectors (colored lines in [Figure 1C](#)) and their weights in each SAXS curve correspond to the scattering of two distinct species and their relative concentrations in each exposure. These relative concentrations depend systematically on total protein concentration in the sample (inset in [Figure 1C](#)). [Figure 1D](#) shows the corresponding  $P(R)$  profiles. The two PTEN species identified in the decomposition have radii of gyration,  $R_g = 2.49$  and  $2.93$  nm. Their Porod volumes were  $V_p = 55 \pm 10$  and  $98 \pm 2$  nm<sup>3</sup>, suggesting that the particle with the lower  $R_g$  is a PTEN monomer and that with the larger  $R_g$  is a homodimer. The same conclusion was derived from a more elaborate analysis of the masses of the scattering particles based on scaling relations ([Rambo and Tainer, 2013](#); [Watson and Curtis, 2014](#)), as shown in detail in [Figure S3](#) and [Table S1](#). Normalized Kratky plots for the monomer and dimer differ significantly at high values of ( $q \times R_g$ ) (see [Figure 1E](#)). Whereas the dimer nearly returns to zero baseline, the monomer does not show convergence. In line with current interpretation of SAXS protein signatures ([Rambo and Tainer, 2011](#)), we conclude that the monomer is partially disordered while the dimer is well folded in its entirety, including the C-terminal tails.

GASBOR ([Svergun et al., 2001](#)) was used for a protein shape reconstruction based on the monomer and dimer vectors. For the monomer, the corresponding envelope was found to fit the PTEN crystal structure well ([Figure 2A](#)). This structure was determined for a truncated protein that lacks  $\approx 18\%$  of the mass of full-length PTEN ([Lee et al., 1999](#)), and the visible underfilling of the protein volume defined by the SAXS results is therefore expected. This approach to data modeling appears reasonable, as all-atom MD simulations of PTEN suggested that there are only subtle differences between the crystal structure of the folded PTEN domains and its solution structure ([Shenoy et al., 2012a](#)). As expected from the dimer vector, the envelope computed for the PTEN dimer showed about twice the volume of the monomer envelope. Due to the lack of atomic-scale structural information on the unstructured protein segments, our search for trial dimer structures using Rosetta ([Lyskov et al., 2013](#)) was performed with the truncated crystal structure ([Lee et al., 1999](#)). Independent runs with and without constraints to C2 symmetry yielded similar low-energy results. Eventually, an unconstrained local run yielded the structure funnel that led to the result with the overall lowest energy score. By sorting the entire set of Rosetta results ( $\approx 10^5$  trial structures) according to their  $R_g$  values ([Figure 2B](#)), four clusters were identified. The configurations associated with all four score funnels are structurally related in that dimerization is driven by interactions between the phosphatase domains while they differ by a translational offset along the protein binding interface ([Figure 2C](#)). In addition, the membrane binding interfaces of both monomers face in the same direction in all these models. However, among these clusters there is only one that fits the experimental data well and is compatible with the  $R_g$  value,  $\approx 2.9$  nm, determined for the decomposed pair distribution function vector. The configurations with the lowest Rosetta energy score within this funnel are almost identical in their structure and filled the dimer envelope particularly well, as shown in [Figure 2D](#) for the hit with the overall lowest energy score.

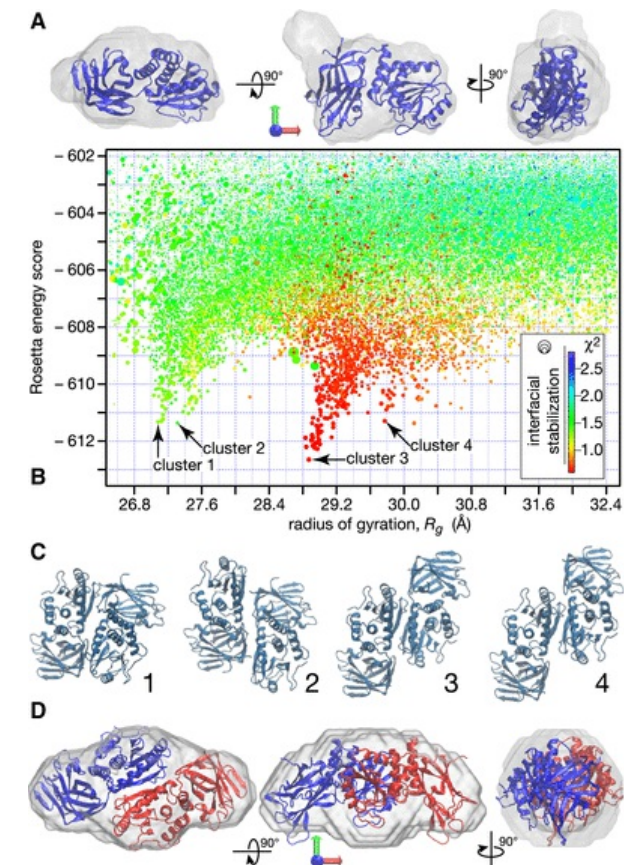

**Figure 2** Structural Modeling the Decomposed SAXS Results

(A) Reconstructed envelope of scattering density for the PTEN monomer in solution with a ribbon model of the truncated crystal structure (Lee et al., 1999) superimposed. When docked to the membrane, the direction of the membrane normal coincides with the green arrow. Two orthogonal rotations transform the view shown in the center into the views to the right and the left.

(B) Rosetta score versus  $R_g$  for trial configurations from global and local Rosetta runs that yielded a Rosetta energy score of  $-602$  or less, and a radius of gyration  $26.6 \leq R_g \leq 32.6$  Å. The symbol color encodes the fit quality ( $\chi^2$ ) between the SAXS curves calculated from the configurations and the experimental SAXS curve obtained for the putative dimer from the decomposition. Because the error bars are slightly overestimated by the data reduction software provided by the facility, the best models show  $\chi^2$  values below unity. The symbol size represents the interfacial energy score  $I_{sc}$  from Rosetta. All symbols larger than the minimum size have interfacial energies that are considered “good” with values  $5 \leq I_{sc} \leq 10$ . The score funnel at  $R_g = 29$  Å yields the globally lowest Rosetta scores and the best fit to the data.

(C) Graphical representation of configurations with the lowest Rosetta scores for the four score funnels indicated in (B).

(D) Reconstructed envelope of scattering density for the large particle obtained from the decomposition, as in (A). The PTEN dimer corresponding to configuration 3 in (B) is superimposed as a ribbon structure.

## Discussion

Although the formation of PTEN homodimers is well supported by genetic evidence (Papa et al., 2014) and provides an intriguing hypothesis relevant to cancer formation following mutation of a single PTEN allele (Berger et al., 2011), the structure and function of such dimers are poorly understood. Using pull-down experiments, we detected dimer formation in bacterially expressed PTEN. With tag-free PTEN protein, this result was verified by SAXS on selected SEC eluent fractions in which we identified PTEN monomer and dimer as a function of protein concentration. By decomposition of the SAXS data into independent contributions, we determined electron density envelopes of two distinct particles that fit the crystal structure of a truncated PTEN (Lee et al., 1999) monomer and dimer well. Supported by Rosetta docking simulations, this suggests a candidate structure for the PTEN homodimer. In recent MD simulations of PTEN monomers in solution, we observed that the regulatory C-terminal tail shows some flexibility and associates with the surface of the PTEN domains in multiple, similar conformations (Shenoy et al., 2012a). While SAXS cannot locate the tail in the candidate dimer structure, it shows conclusively

that PTEN has a more compact conformation in the dimer than the monomer configuration, suggesting that the tail is stably associated with the protein domain surfaces. If this association occurs across the dimer, analogous to three-dimensional domain swapping common for other proteins (Liu and Eisenberg, 2002; Rousseau et al., 2003), this can provide a novel mechanism to stabilize the PTEN homodimer.

While SAXS provides only low-resolution structural information, our refinement of the scattering results with Rosetta leads to an attractive model that shows features consistent with previous biochemical characterizations of the PTEN dimer (Papa et al., 2014). Furthermore, the importance of the C-terminal tail for dimerization explains why the truncated PTEN protein used for X-ray crystallography did not show a dimer (Lee et al., 1999). This model also motivates predictions that can be tested in future work. (1) Without imposing constraints, all low-energy Rosetta models show approximate C2 symmetry and arrange the monomers such that their membrane binding interfaces are coplanar. This is consistent with the fact that no higher-order oligomers are experimentally observed, and suggests that the membrane affinity of the dimer is considerably higher than that of the monomer. (2) In our structural model, the two phosphatase domains form the dimer interface, whereas the C2 domains are not involved in this interaction. This agrees with results by Papa and co-workers, which showed that an N-terminal fragment of PTEN that contained the phosphatase domain was more effective in binding to full-length PTEN in a pull-down assay than the C-terminal portion of the protein (Figure 2B in Papa et al., 2014), suggesting that the phosphatase domain is indeed critical for dimerization. While the two C2 domains thus act independently of each other in membrane binding, the phosphatase domains might mutually affect each other in the tightly bound dimer state to optimize the efficiency of their catalytic sites. (3) Rosetta predicts that major contacts within the dimer occur between the two phosphatase domains, and implicates the  $\alpha 2$  helix and  $\beta 4$  sheet in dimer stabilization. These predictions can be directly tested in future mutation studies aimed at controlling the monomer-dimer equilibrium. (4) Finally, we suggest that the C-terminal tails stabilize the dimer by crossing between its monomeric constituents in a domain-swapping exchange. If this is confirmed, it will be interesting to test whether inhibition of the PTEN tumor suppressor function in cancer-associated mutations results from a reduction of dimer stability, protein misfolding, or both. In our model, we speculate that cellular control of PTEN activity results from dimer destabilization upon phosphorylation of the C-terminal tail. This hypothesis is consistent with previous results by Papa and co-workers. These investigators showed that PTEN with a non-phosphorylatable version of the C-terminal tail (PTEN4A), which is functionally more active than wild-type PTEN (Vazquez et al., 2000), has increased dimeric fractions in gel filtration assays (Figure 2I in Papa et al., 2014). Moreover, MD simulations of soluble PTEN monomer (Shenoy et al., 2012a) suggest that the C-terminal tail has a tendency to fold against the PTEN domains and is sufficiently long to obstruct the membrane binding interface, which may interfere with dephosphorylation of the membrane bound lipid substrate.

The results of this study lead to significant refinements of our understanding of the mechanism for  $\text{PI}(3,4,5)\text{P}_3$  dephosphorylation by PTEN and its cellular control. The evolution of the underlying models is schematically summarized in Figure 3, starting with the hypothesis in Figure 3A that phosphorylation of the C-terminal tail interferes with PM binding of the PTEN monomer (Rahdar et al., 2009; Ross and Gericke, 2009). Biochemical and genetic evidence recently implied a PTEN homodimer in maintaining  $\text{PI}(4,5)\text{P}_2/\text{PI}(3,4,5)\text{P}_3$  homeostasis in healthy cells, as shown in Figure 3B (Leslie and den Hertog, 2014; Papa et al., 2014). Here, we refine this model by providing a structural basis to the PTEN dimer hypothesis (Figure 3D), based upon experimental observations in vitro and computational modeling using the truncated PTEN X-ray structure (Figure 3C). Consistent with this model, it was recently shown that the binding of the phosphoinositide  $\text{diC}_6\text{PI}(4,5)\text{P}_2$  to the N-terminal sequence of PTEN was associated with PTEN dimer formation in solution (Wei et al., 2015). Thus, high concentrations of  $\text{PI}(4,5)\text{P}_2$  in lipid rafts may further promote PTEN accumulation and dimerization in vivo, in agreement our in vitro experiments carried out with high PTEN concentrations. Of note, refolding of domain swap dimers may occur as a function of protein concentration (Rousseau et al., 2004).

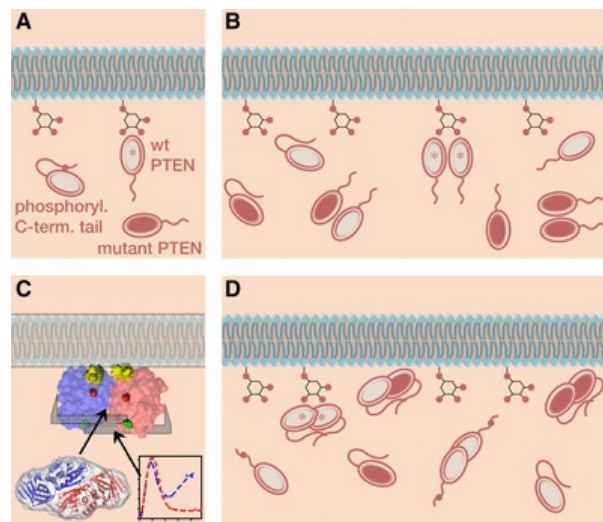

**Figure 3** Evolution of PTEN Membrane Interaction Models

The figure is redrawn after Figure 1 in Leslie and den Hertog (2014). The enzymatically productive PTEN species in each model are marked with asterisks.

(A) Cellular control of PTEN membrane interaction through phosphorylation (red dots) of the unstructured C-terminal tail (Rahdar et al., 2009). In this model, the phosphorylated tail blocks the membrane binding interface of wild-type PTEN, interfering with its enzymatic processing of PI(3,4,5)P<sub>3</sub> in the plasma membrane (Ross and Gericke, 2009). Mutant PTEN (red filled) may interact with the membrane but is enzymatically inactive.

(B) The PTEN dimer hypothesis (Papa et al., 2014) explains the dominant-negative behavior of PTEN mutants. Independent of tail phosphorylation, only homodimers of wild-type PTEN are enzymatically active while monomers or dimers that involve mutant PTEN are inactive or reduced in their activity.

(C and D) Refinement of the dimer model through this work. The SAXS results provide a structural basis for the PTEN dimer hypothesis and lead to a reinterpretation of the role of tail phosphorylation. The structural model, Figure 2D, predicts that the PTEN homodimer is formed through interactions between the two phosphatase domains, in agreement with results from the pull-down assays conducted by Papa and co-workers. Furthermore, the two membrane binding interfaces in the dimer are oriented in the same direction and form a flat, partially hydrophobic plane with exposed cationic residues for association with the plasma membrane (C). Within the outline of the folded protein domain in this schematic view, yellow residues mark the two CBR3 loops, the catalytic cores (C124 residues) are shown in red, and the location where the C-terminal tails emerge from the folded domains (E352 residues) is shown in green. As indicated by the Kratky analysis, the C-terminal tails are firmly bound against the folded PTEN domains, which suggests that the tails form “brackets” that stabilize the dimer. These observations lead to the following refinement of the dimer model (D). Wild-type PTEN homodimer formation may be required to activate the phosphatase through structural adjustments around the substrate binding pocket, making the dimer more productive than the wild-type PTEN monomer. Alternatively, the increased productivity of the PTEN dimer could also result just from a higher affinity to the anionic inner plasma membrane than that of a wild-type PTEN monomer. However, this would not explain why the wild-type/mutant PTEN heterodimer has a strongly reduced enzymatic activity. In distinction to the scenario in (A), phosphorylation of the PTEN C-terminal tail may decrease the interaction of the tail with the folded PTEN domains, thereby reducing the stability of the dimer.

In conclusion, we show that the bacterially expressed PTEN phosphatase dimerizes efficiently in vitro at micromolar concentrations, and provide a candidate structure of the homodimer with critical interactions between the two phosphatase domains. Dimer formation may thereby result in cooperativity in PTEN membrane binding through the paired C2 domains, leading to increased enzyme affinity for the PM. In addition, the presumed tight binding of the juxtaposed phosphatase domains to each other could lead to conformational changes around the catalytic site that enhance the efficiency of lipid dephosphorylation. Clearly, the conjectures derived from our results need to be tested in mutation studies of the proposed dimer binding interface and manipulations of the phosphorylation state of the PTEN C-terminal tail.

## Experimental Procedures

### Protein Expression and GST Pull-Down Assay

PTEN protein was expressed and purified as described by Redfern et al. (2008). Human PTEN with a C-terminal His-tag was expressed in *Escherichia coli* BL21 (DE3). For the SAXS experiments, the His-tag was cleaved off using enterokinase. The GST pull-down assay was carried out using a batch method (see Results and Figure S1). Purified GST-PTEN and PTEN-His<sub>6</sub> were mixed in an equimolar ratio and allowed to incubate a bed of pre-equilibrated glutathione Sepharose 4B (GE Healthcare Life Sciences) for 1 hr at 4°C on a rocker. As a negative control, GST protein and PTEN-His<sub>6</sub> were mixed using the same protocol. The resin was washed with buffers containing 0.5% Triton X-100, 0.1% Triton X-100, and finally detergent-free wash buffer. The remaining protein was eluted using 10 mmol/l reduced glutathione in Tris at pH 8.0. The eluted fractions were analyzed by SDS-PAGE. To confirm the presence of PTEN-His<sub>6</sub>, a western blot was carried out using a His-tag specific antibody.

### Small-Angle X-Ray Scattering

Bacterially expressed, tag-free PTEN protein dissolved in 10 mM HEPES, 250 mM NaCl, and 1 mM DTT (pH 7.4) was investigated in SAXS experiments at room temperature. Measurements were carried out at the APS BioCAT beamline (sector 18) of Argonne National Laboratory, as described earlier (Mathew et al., 2004). The 12-keV X-ray beam ( $\lambda = 1.03 \text{ \AA}$ ) was focused on a 1.5-mm quartz capillary sample cell. The scattering, in the momentum transfer range,  $q = 0.0065\text{--}0.3 \text{ \AA}^{-1}$ , was collected on a Mar165 CCD detector approximately 2.5 m downstream of the sample position. The protein solution was fed into the X-ray beam after passing through a Superdex-200 10/300 GL gel SEC column onto which  $\approx 500 \mu\text{l}$  were loaded at 4 mg/ml. A capillary fed the eluent first through a UV detector and then to the SAXS sample cell. The delay between protein emerging from the SEC column and its arrival at the beam position was about 1 min. SAXS exposures with a length of 1 s were collected every 5 s during the gel filtration chromatography run. Exposures before and after sample elution were averaged and used as buffer background. Exposures during elution that coincided with the UV peak on the chromatogram were treated as sample (protein + buffer) SAXS curves. Pair distribution functions,  $P(R)$ , of the scattering centers were computed from the scattering curves using GNOM (Svergun, 1992). To analyze the systematic shift of scattering curves with sample concentration, we decomposed these into two basis functions by global fitting of all 14 SAXS spectra simultaneously with a Monte Carlo Markov chain, similar to a procedure previously described for the evaluation of NR data (Kirby et al., 2012). Full details are provided in Figures S2 and S3, and Table S1.

### Rosetta Protein Docking

Prior to the docking simulations, the truncated X-ray structure of the PTEN monomer (Lee et al., 1999) was supplemented with hydrogen atoms using MolProbity4 (Chen et al., 2010), and pre-packed using the Rosetta 3.5 Prepack Protocol (Gray et al., 2003). Unconstrained global docking simulations using the Rosetta 3 Protein Docking Protocol (Gray et al., 2003) were performed using two copies of the pre-packed structure as input. The orientations of both docking partners were randomized, and default options for adding extra side-chain rotamers were applied (Wang et al., 2005). Local docking simulations without symmetry constraint did not randomize the orientations of the docking partners but, instead, allowed for a random perturbation of the input structures using a Gaussian for translation and rotation with SDs of 8 Å and 8°, respectively. The Rosetta 3.5 Symmetric Docking Protocol (André et al., 2007) was used for the docking simulation with C2 symmetry constraint. Default options for adding side-chain rotamers were applied. All docking simulations were performed with the low- and the high-resolution part of the protocol. ATSAS Crysol (Svergun et al., 1995) was used with default parameters to calculate the radius of gyration for every configuration, and to fit the theoretical SAXS curve to

the experimental data. The option of a constant subtraction was enabled during the fit.

## Author Contributions

F.H. and M.L. designed the research and planned the experiments. R.K.H. with the help of A.H.R. purified the protein and performed its biochemical characterization. F.H. and S.C. conducted the experiments. F.H. conceived and conducted the data evaluation. F.H. and H.N. performed the modeling studies. F.H., A.H.R., A.G., and M.L. wrote the manuscript. All authors discussed the results and commented on the manuscript at all stages.

## Acknowledgments

We thank Weifeng Shang and Thomas Irving for assistance with data reduction. This research was supported by the Department of Commerce (MSE 70NANB11H8139 and 70NANB13H009), NIGMS (R01 GM101647), NINDS (R01 NS021716) and the NSF (CHEM 1216827) and used resources of the Advanced Photon Source, a U.S. Department of Energy (DOE) Office of Science User Facility operated under contract no. DE-AC02-06CH11357. The BioCAT facility is supported by the NIGMS (P41 GM103622).

## Supplemental Information

Supplemental Information includes information on the biochemical characterization of the PTEN dimer and details of the SAXS data evaluation, three figures, and one table and can be found with this article online at <http://dx.doi.org/10.1016/j.str.2015.07.012>.

## References

- André I., Bradley P., Wang C. and Baker D., Prediction of the structure of symmetrical protein assemblies, *Proc. Natl. Acad. Sci. USA* **104**, 2007, 17656–17661.
- Berger A.H., Knudson A.G. and Pandolfi P.P., A continuum model for tumour suppression, *Nature* **476**, 2011, 163–169.
- Chen V.B., Arendall W.B., Headd J.J., Keedy D.A., Immormino R.M., Kapral G.J., Murray L.W., Richardson J.S. and Richardson D.C., MolProbity: all-atom structure validation for macromolecular crystallography, *Acta Crystallogr. D Biol. Crystallogr.* **66**, 2010, 12–21.
- Gray J.J., Moughon S., Wang C., Schueler-Furman O., Kuhlman B., Rohl C.A. and Baker D., Protein-protein docking with simultaneous optimization of rigid-body displacement and side-chain conformations, *J. Mol. Biol.* **331**, 2003, 281–299.
- Huang J., Yan J., Zhang J., Zhu S., Wang Y., Shi T., Zhu C., Chen C., Liu X., Cheng J., et al., SUMO1 modification of PTEN regulates tumorigenesis by controlling its association with the plasma membrane, *Nat. Commun.* **3**, 2012, 911–922.
- Kirby B.J., Kienzle P.A., Maranville B.B., Berk N.F., Krycka J., Heinrich F. and Majkrzak C.F., Phase-sensitive specular neutron reflectometry for imaging the nanometer scale composition depth profile of thin-film materials, *Curr. Opin. Colloid Interf. Sci.* **17**, 2012, 44–53.
- Lee J.O., Yang H., Georgescu M.M., Di Cristofano A., Maehama T., Shi Y., Dixon J.E., Pandolfi P.P. and Pavletich N.P., Crystal structure of the PTEN tumor suppressor: implications for its phosphoinositide phosphatase activity and membrane association, *Cell* **99**, 1999, 323–334.
- Leslie N.R. and den Hertog J., Mutant PTEN in cancer: worse than nothing, *Cell* **157**, 2014, 527–529.
- Li J., Yen C., Liaw D., Podsypanina K., Bose S., Wang S.I., Puc J., Miliareis C., Rodgers L., McCombie R., et al., PTEN, a putative protein tyrosine phosphatase gene mutated in human brain, breast, and prostate cancer, *Science* **275**, 1997, 1943–1947.
- Liu Y. and Eisenberg D., 3D domain swapping: as domains continue to swap, *Protein Sci.* **11**, 2002, 1285–1299.
- Lyskov S., Chou F.-C., Conchúir S.Ó., Der B.S., Drew K., Kuroda D., Xu J., Weitzner B.D., Renfrew P.D., Sripakdeevong P., et al., Serverification of molecular modeling applications: the Rosetta Online Server that Includes Everyone (ROSIE), *PLoS One* **8**, 2013, e63906.
- Marsh D.J., Coulon V., Lunetta K.L., Rocca-Serra P., Dahia P.L., Zheng Z., Liaw D., Caron S., Duboué B., Lin A.Y., et al., Mutation spectrum and genotype-phenotype analyses in Cowden disease and Bannayan-Zonana syndrome, two hamartoma syndromes with germline PTEN mutation, *Hum. Mol. Genet.* **7**, 1998, 507–515.
- Mathew E., Mirza A. and Menhart N., Liquid-chromatography-coupled SAXS for accurate sizing of aggregating proteins, *J. Synchrotron Radiat.* **11**, 2004, 314–318.



- Papa A., Wan L., Bonora M., Salmena L., Song M.S., Hobbs R.M., Lunardi A., Webster K., Ng C., Newton R.H., et al., Cancer-associated PTEN mutants act in a dominant-negative manner to suppress PTEN protein function, *Cell* **157**, 2014, 595–610.
- Rahdar M., Inoue T., Meyer T., Zhang J., Vazquez F. and Devreotes P.N., A phosphorylation-dependent intramolecular interaction regulates the membrane association and activity of the tumor suppressor PTEN, *Proc. Natl. Acad. Sci. USA* **106**, 2009, 480–485.
- Rambo R.P. and Tainer J.A., Characterizing flexible and intrinsically unstructured biological macromolecules by SAS using the Porod-Debye law, *Biopolymers* **95**, 2011, 559–571.
- Rambo R.P. and Tainer J.A., Accurate assessment of mass, models and resolution by small-angle scattering, *Nature* **496**, 2013, 477–481.
- Redfern R.E., Redfern D.A., Furgason M.L., Munson M., Ross A.H. and Gericke A., PTEN phosphatase selectively binds phosphoinositides and undergoes structural changes, *Biochemistry* **47**, 2008, 2162–2171.
- Redfern R.E., Daou M., Li L., Munson M., Gericke A. and Ross A.H., A mutant form of PTEN linked to autism, *Protein Sci.* **19**, 2010, 1948–1956.
- Ross A.H. and Gericke A., Phosphorylation keeps PTEN phosphatase closed for business, *Proc. Natl. Acad. Sci. USA* **106**, 2009, 1297–1298.
- Rousseau F., Schymkowitz J.W.H. and Itzhaki L.S., The unfolding story of three-dimensional domain swapping, *Structure* **11**, 2003, 243–251.
- Rousseau F., Schymkowitz J.W.H., Wilkinson H.R. and Itzhaki L.S., Intermediates control domain swapping during folding of p13<sup>suc1</sup>, *J. Biol. Chem.* **279**, 2004, 8368–8377.
- Shenoy S., Nanda H. and Lösche M., Membrane association of the PTEN tumor suppressor: electrostatic interaction with phosphatidylserine-containing bilayers and regulatory role of the C-terminal tail, *J. Struct. Biol.* **180**, 2012a, 394–408.
- Shenoy S., Shekhar P., Heinrich F., Daou M.-C., Gericke A., Ross A.H. and Lösche M., Membrane association of the PTEN tumor suppressor: molecular details of the protein-membrane complex from SPR binding studies and neutron reflection, *PLoS One* **7**, 2012b, e32591.
- Simpson L. and Parsons R., PTEN: life as a tumor suppressor, *Exp. Cell Res.* **264**, 2001, 29–41.
- Steck P.A., Pershouse M.A., Jasser S.A., Yung W.K., Lin H., Ligon A.H., Langford L.A., Baumgard M.L., Hattier T., Davis T., et al., Identification of a candidate tumour suppressor gene, MMAC1, at chromosome 10q23.3 that is mutated in multiple advanced cancers, *Nat. Genet.* **15**, 1997, 356–362.
- Stiles B.L., Phosphatase and tensin homologue deleted on chromosome 10: extending its PTENTacles, *Int. J. Biochem. Cell Biol.* **41**, 2009, 757–761.
- Svergun D.I., Determination of the regularization parameter in indirect-transform methods using perceptual criteria, *J. Appl. Crystallogr.* **25**, 1992, 495–503.
- Svergun D., Barberato C. and Koch M., CRY SOL—a program to evaluate X-ray solution scattering of biological macromolecules from atomic coordinates, *J. Appl. Crystallogr.* **28**, 1995, 768–773.
- Svergun D.I., Petoukhov M. and Koch M.H.J., Determination of domain structure of proteins from X-ray solution scattering, *Biophys. J.* **80**, 2001, 2946–2953.
- Vazquez F., Ramaswamy S., Nakamura N. and Sellers W., Phosphorylation of the PTEN tail regulates protein stability and function, *Mol. Cell. Biol.* **20**, 2000, 5010–5018.
- Vazquez F., Matsuoka S., Sellers W.R., Yanagida T., Ueda M. and Devreotes P.N., Tumor suppressor PTEN acts through dynamic interaction with the plasma membrane, *Proc. Natl. Acad. Sci. USA* **103**, 2006, 3633–3638.
- Wang C., Schueler-Furman O. and Baker D., Improved side-chain modeling for protein-protein docking, *Protein Sci.* **14**, 2005, 1328–1339.
- Watson M.C. and Curtis J.E., Probing the average local structure of biomolecules using small-angle scattering and scaling laws, *Biophys. J.* **106**, 2014, 2474–2482.
- Wei Y., Stec B., Redfield A.G., Weerapana E. and Roberts M.F., Phospholipid-binding sites of phosphatase and tensin homolog (PTEN): Exploring the mechanism of phosphatidylinositol 4,5-bisphosphate activation, *J. Biol. Chem.* **290**, 2015, 1592–1606.

## Supplemental Information

[Multimedia Component 1](#)

**Graphical Abstract**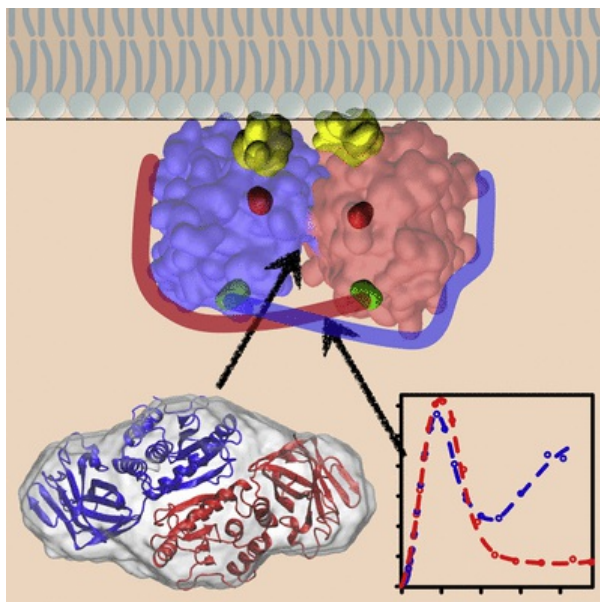**Highlights**

- The PTEN tumor suppressor forms a homodimer in solution
- SAXS/Rosetta determine a unique dimer structure with planar membrane binding surface
- PTEN's disordered regulatory C-terminal tail is well folded on the dimer
- A structural basis emerges for the PTEN dimer hypothesis and cellular control of PTEN
